# Supplementary material for: In Situ Polymerization of Nylon 66/Reduced Graphene Oxide Nanocomposites
Source: Hindawi journal article supplement (doi:10.1155/2018/1047985), 2018-09-13
Supplement: f1 [file 1047985.f1.pdf]

## Supplementary Materials

### In situ polymerization of nylon 66/reduced graphene oxide nanocomposites

Xiaochao Duan<sup>a,b</sup>, Bin Yu<sup>a,b</sup>, Tonghui Yang<sup>a,b</sup>, Yanpeng Wu<sup>a,b</sup>, Hao Yu<sup>a,b\*</sup>, Tao Huang<sup>a,b\*</sup>

<sup>a</sup> State Key Lab for Modification of Chemical Fibers & Polymer Materials, Shanghai, China

<sup>b</sup> College of Material Science & Engineering, Donghua University, Shanghai, China

No.2999 North Renmin Road, Songjiang District, Shanghai, P. R. China, 201620.

\*Corresponding author. Tel.: +86-21-67792853.

E-mail: [yh@dhu.edu.cn](mailto:yh@dhu.edu.cn). (Hao Yu), [ht@dhu.edu.cn](mailto:ht@dhu.edu.cn) (Tao Huang)

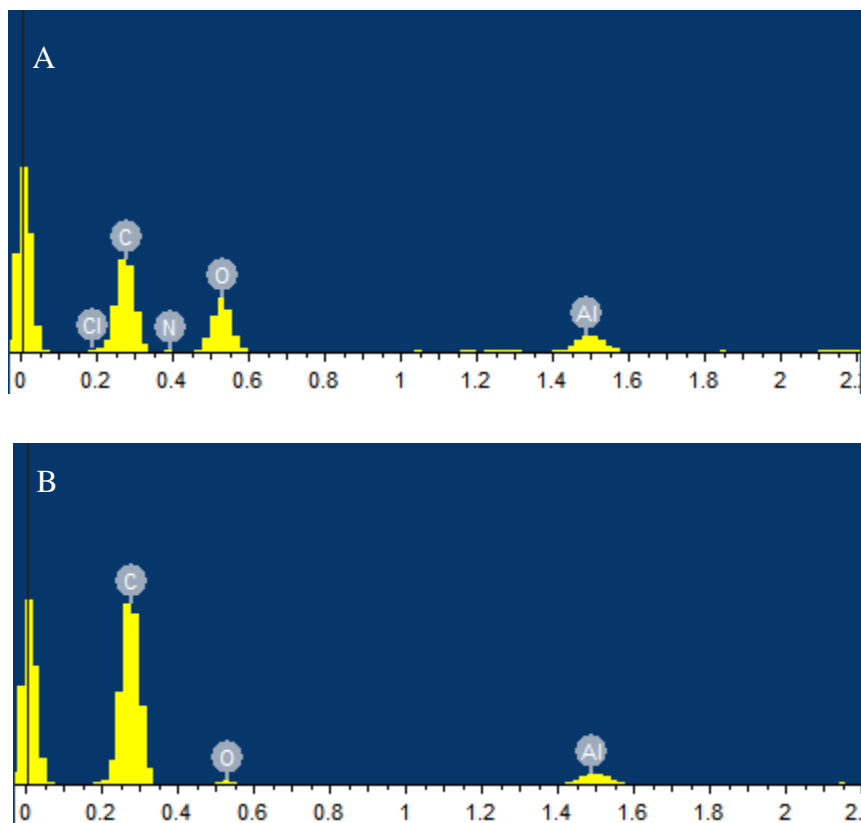

Fig. S1. EDS of The SEM photographs of GO(A) and f-rGO-1(B).

**Fig. S1 displayed the EDS measurement of the SEM photographs, this results showed that the C:O ratio of f-rGO-1 rises to 17.29 compared with 1.65 for the native GO, confirming a high level of GO reduction, which was accordance with the TGA measurement (Fig.5).**

**Table S1** Raman data containing  $I_D/I_G$  peak ratios of graphene

| Sample          | GO   | f-rGO-0.25 | f-rGO-0.5 | f-rGO-0.75 | f-rGO-1 |
|-----------------|------|------------|-----------|------------|---------|
| $I_D/I_G$ Ratio | 1.22 | 1.17       | 1.21      | 1.25       | 1.29    |

**The  $I_D/I_G$  peak ratios of graphene were calculated by means of Raman-peak-differenciation-imitating and integrated that peaks through Origin software.**

**Table S2** Degree of crystallinity of PA66 and PA-rGO samples from XRD data through Jade software.

| Sample            | PA66 | PA-rGO-0.25 | PA-rGO-0.5 | PA-rGO-0.75 | PA-rGO-1 |
|-------------------|------|-------------|------------|-------------|----------|
| Crystallinity (%) | 22.8 | 27.4        | 31.5       | 35.4        | 27.2     |
